# Supplementary material
Source: HighWire-hosted journal article supplement (http://qualitysafety.bmj.com/highwire/filestream/147400/field_highwire_adjunct_files/1/Appendix_II.pdf)

**APPENDIX II**

**Dendrograms from the hierarchical cluster analysis of dimensions (acute and psychiatric hospitals)**

**Acute hospitals (n = 90)**

**Dendrogram using Average Linkage (Between Groups)**

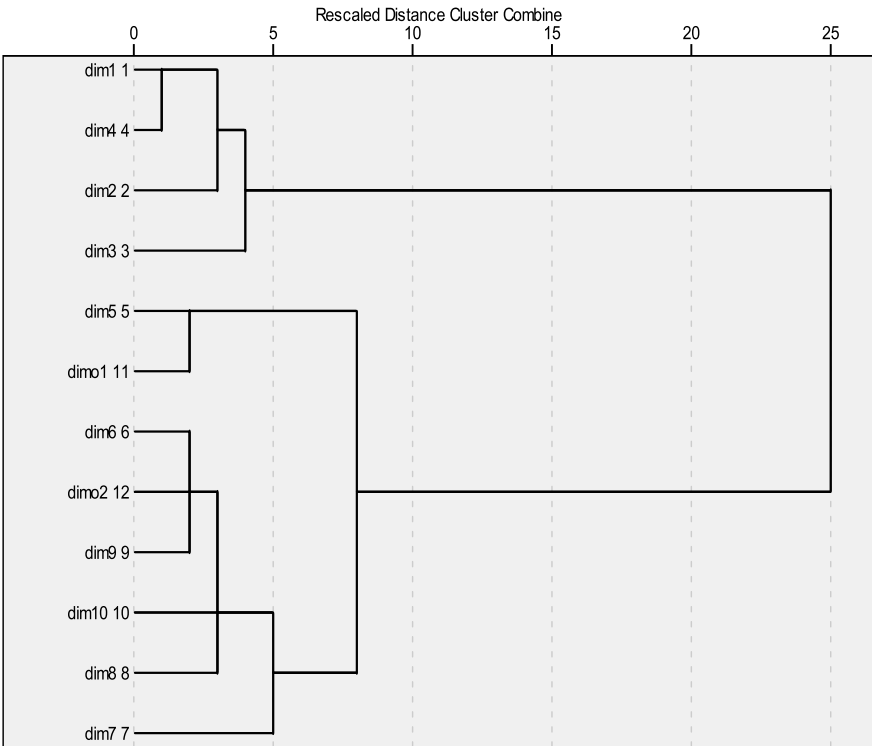

**Psychiatric hospitals (n = 42)**

**Dendrogram using Average Linkage (Between Groups)**

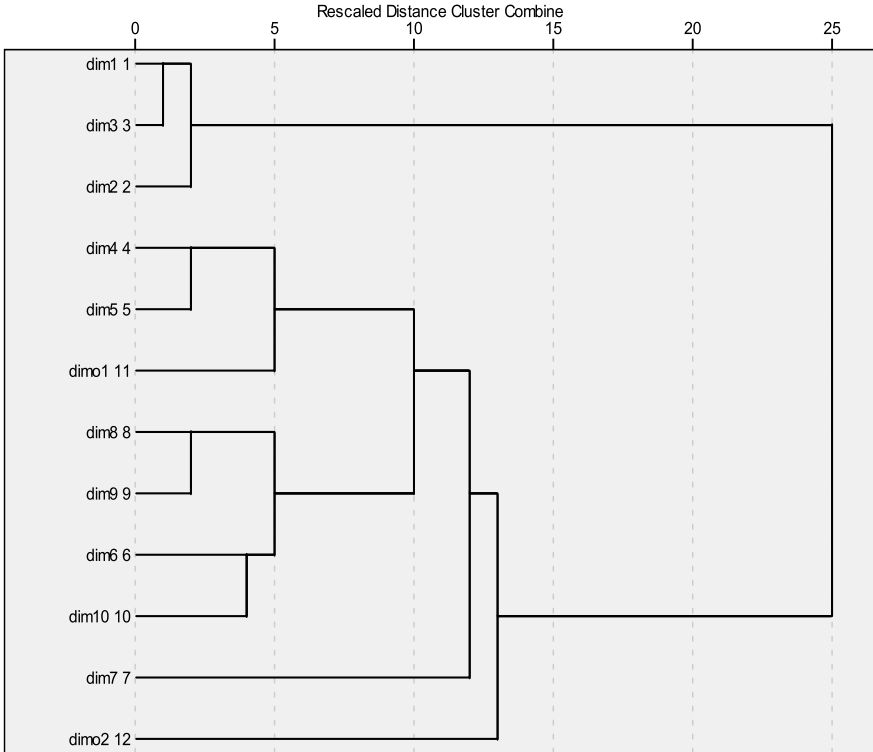

## APPENDIX II

### Dendograms from the hierarchical cluster analysis of dimensions (acute and psychiatric hospitals)

Acute hospitals (n = 90)

Dendogram using centroid clustering

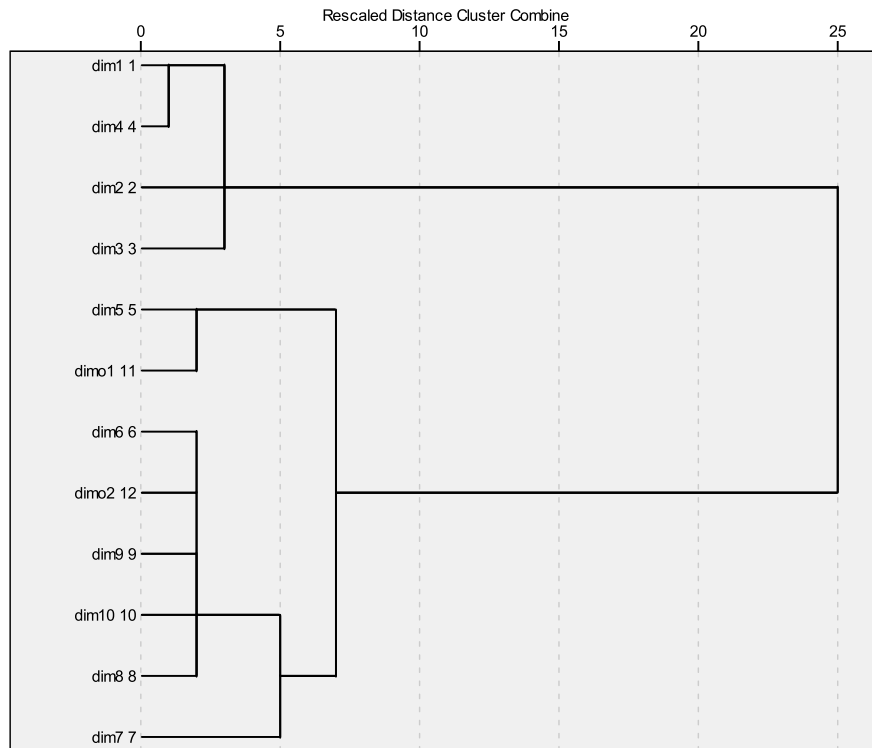

Psychiatric hospitals (n = 42)

Dendogram using centroid clustering

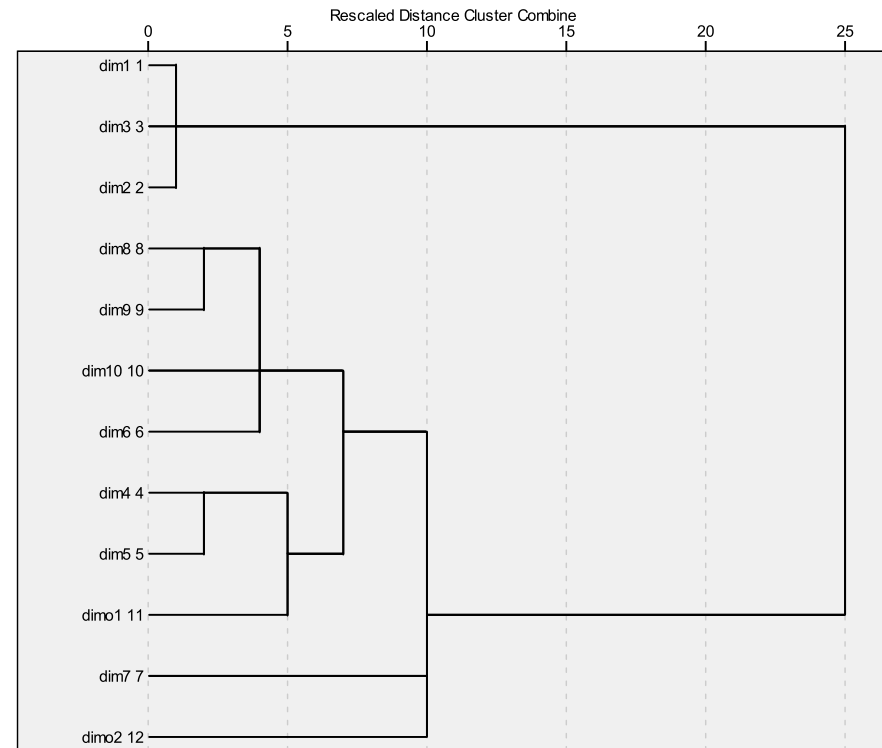

## APPENDIX II

### Dendograms from the hierarchical cluster analysis of dimensions (acute and psychiatric hospitals)

Acute hospitals (n = 90)

Dendogram using median clustering

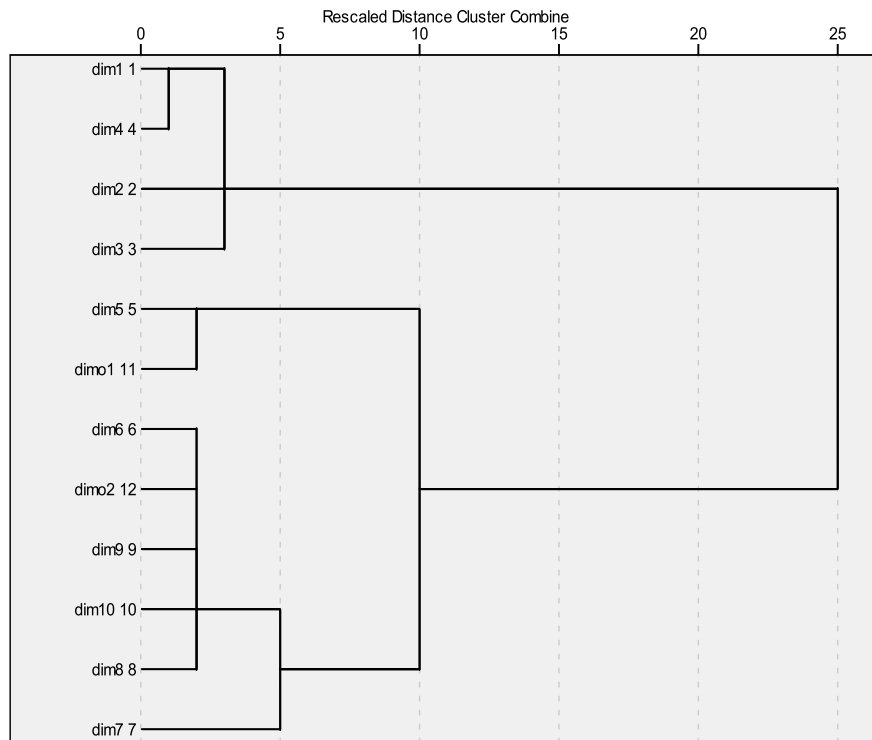

Psychiatric hospitals (n = 42)

Dendogram using median clustering

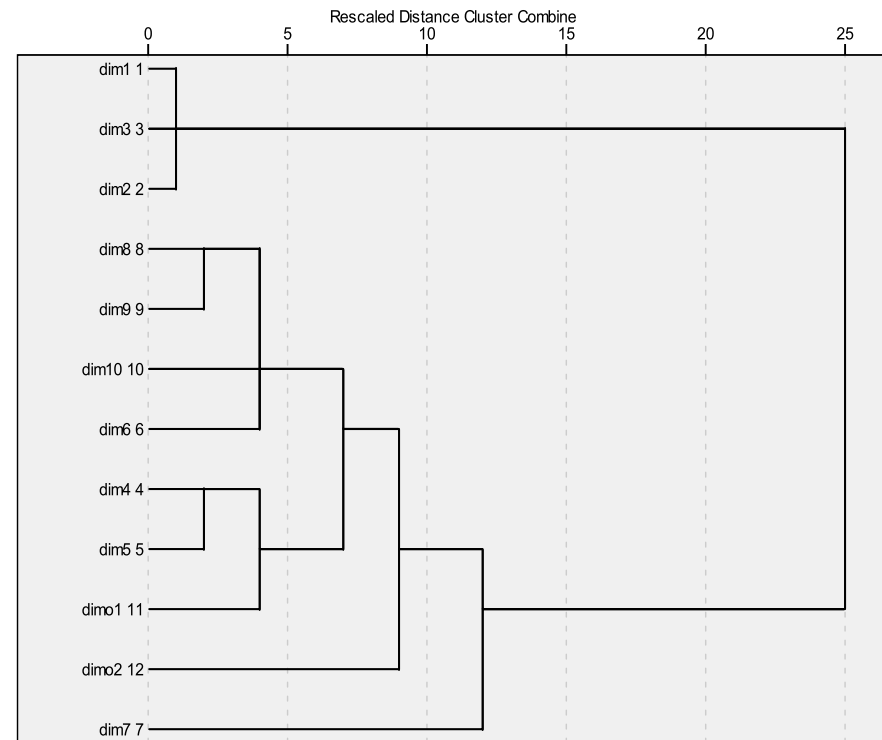

Supplement: Appendix_II.pdf [file Appendix_II.pdf]
